# Supplementary material
Source: Research Square preprint supplement (doi:10.21203/rs.3.rs-9132959/v1)
Supplement: Supplementary file 1 [file 19e146ec43035b2ad6fbf6af.docx]

Journal of Cancer Research and Clinical Oncology

METTL17 promotes gastric cancer progression by activating the Wnt/β-catenin signaling pathway through negative regulation of GSK-3β

Man Gao1#, Yixun Zhang1#, Wenjing Bao1#, Yilin Shi2, Weiyi Chen3, Yang Liu1, Rumeng Wang1, Ning Zhang1, Lingli Zhang4*, Lizhou Jia1*

* Correspondence:

Lizhou Jia*, College of Veterinary Medicine, Inner Mongolia Agricultural University, Hohhot, Inner Mongolia, China

jlz@immu.edu.cn

Univariate and multivariate analyses of the prognostic factors for overall survival in GC

|  | Univariate analysis | | | Multivariate analysis | | |  |
| --- | --- | --- | --- | --- | --- | --- | --- |
|  | HR | P -value | 95%CI | HR | P-value | 95%CI |  |
| **METTL17 expression** |  |  |  |  |  |  |  |
| High vs Low or no | 3.710 | **＜0.001*** | 2.882 4.777 | 3.118 | **＜0.001*** | 2.401 4.049 |  |
| **Age (year)** |  |  |  |  |  |  |  |
| <60 vs ≥60 | 1.316 | **0.012*** | 1.061 1.632 | 1.194 | 0.112 | 0.959 1.485 |  |
| **Gender** |  |  |  |  |  |  |  |
| Male vs Female | 0.962 | 0.735 | 0.767 1.206 |  |  |  |  |
| **Differentiation** |  |  |  |  |  |  |  |
| Well vs Moderate vs Poor | 1.242 | **0.002*** | 1.086 1.420 | 1.274 | **＜0.001*** | 1.114 1.458 |  |
| **Helicobacter pylori** |  |  |  |  |  |  |  |
| Positive vs Negative | 1.370 | **0.004*** | 1.107 1.695 | 1.073 | 0.552 | 0.850 1.356 |  |
| **Tumor disameter** |  |  |  |  |  |  |  |
| Tis+T1 + T2 vs T3 + T4 | 1.117 | 0.081 | 0.986 1.265 |  |  |  |  |
| **Lymph node metastasis** |  |  |  |  |  |  |  |
| N0 vs N1 + N2 | 1.047 | 0.324 | 0.956 1.146 |  |  |  |  |
| **Distant metastasis** |  |  |  |  |  |  |  |
| M0 vs M1 | 5.288 | **＜0.001*** | 4.144 6.748 | 3.624 | **＜0.001*** | 2.495 5.265 |  |
| **TNM stage** |  |  |  |  |  |  |  |
| I + II vs III + IV | 1.597 | **＜0.001*** | 1.433 1.779 | 1.439 | **＜0.001*** | 1.291 1.604 |  |

*P*<0.05

HR: Hazard ratio; CI: Confidence interval.
