# Supplementary material
Source: Research Square preprint supplement (doi:10.21203/rs.3.rs-9132959/v1)
Supplement: Supplementary file 2 [file 9b734b64c4d03c57441bc7e1.docx]

Journal of Cancer Research and Clinical Oncology

METTL17 promotes gastric cancer progression by activating the Wnt/β-catenin signaling pathway through negative regulation of GSK-3β

Man Gao1#, Yixun Zhang1#, Wenjing Bao1#, Yilin Shi2, Weiyi Chen3, Yang Liu1, Rumeng Wang1, Ning Zhang1, Lingli Zhang4*, Lizhou Jia1*

* Correspondence:

Lizhou Jia*, College of Veterinary Medicine, Inner Mongolia Agricultural University, Hohhot, Inner Mongolia, China

jlz@immu.edu.cn

Materials and methods

Lentiviral Transduction

All plasmids used in this study were purchased from Shanghai GeneChem Co., Ltd. Specifically, recombinant lentiviral vectors for METTL17 knockdown and overexpression were constructed based on the GV493 and GV492 lentiviral vectors, respectively. The recombinant vectors were co-transfected with a lentiviral packaging helper plasmid into HEK293T cells. Cell supernatants were collected 48 hours later, filtered through a 0.45 μm membrane filter, and then centrifuged to concentrate the solution. The resulting high-titer recombinant lentivirus was aliquoted and stored at −80 °C.

Quantitative Polymerase Chain Reaction(qPCR)

Following the instructions, total cellular RNA was extracted using an RNA extraction kit (Vazyme, China), and cDNA was synthesized using a reverse transcription kit (Vazyme, China) with the RNA sample as a template. The resulting cDNA was used to prepare reaction mixtures with qPCR reaction reagents (Vazyme, China), and quantitative real-time polymerase chain reaction (qRT-PCR) was performed on a Thermo 7500 Fast real-time PCR system (Thermo Fisher Scientific, USA). The relative expression levels of the target genes were calculated using the 2−ΔΔCq method.

Primer information:

| METTL17 Forward primer | CATCCCCTTCAGCTGGAACA |
| --- | --- |
| METTL17 Reverse primer | GACAGGCTGAGTGATACGGG |
| GAPDH Forward primer | GGAGCGAGATCCCTCCAAAAT |
| GAPDH Reverse primer | GGCTGTTGTCATACTTCTCATGG |

Western blot

When cell confluence reaches 80%–90%, harvest the cells and lyse them with RIPA lysis buffer (Biosharp, China) for 30 minutes. Centrifuge to collect the supernatant, add protein loading buffer (Biosharp, China), and heat at 95°C for 10 minutes. Equal volumes of protein were subjected to SDS-PAGE electrophoresis, transferred to a membrane, and blocked with skim milk, followed by incubation with primary and secondary antibodies, respectively. Protein bands were visualized using an enhanced chemiluminescence assay.

Antibody information:

| **Antibody** | **Dilution** | **Company** | **catalog** |
| --- | --- | --- | --- |
| GAPDH | 1:10000 | Proteintech | 10494-1-AP |
| METTL17 | 1:1000 | BOSTER | A14339-1 |
| GSK-3β | 1:2000 | Abmart | MT3006 |
| β-catenin | 1:1000 | Abmart | M24002 |

Cell Counting Kit-8 (CCK-8) Cell Proliferation Assay

Cells were seeded into 96-well plates at a density of 3×10³ cells per well and cultured overnight to allow adherence. At 24, 48, and 72 hours after treatment, CCK-8 reagent was added according to the manufacturer’s instructions. Following incubation for 2 hours in the cell incubator under light protection, the absorbance at 450 nm was measured using a microplate reader. All experiments were performed in triplicate.

Transwell Migration and Invasion Assay

When cell confluence reached 80%–90%, the cells were digested and centrifuged, then resuspended in serum-free medium. A total of 3 × 10⁴ cells were seeded into the upper chamber of the Transwell (some with Matrigel, some without), while the lower chamber was filled with medium containing 20% fetal bovine serum. After 24 hours of culture, the cells were fixed with methanol for 20 minutes, then stained with 0.1% crystal violet for 20 minutes. The upper chamber was gently wiped with a cotton swab, and photographs were taken and cell counts performed under a microscope. All experiments were repeated three times.

Human gastric tissue samples

The pathological specimens used in this study were obtained from Bayannur Hospital. None of the patients had received chemotherapy or radiotherapy prior to surgery or biopsy. The study was performed in accordance with medical ethical standards and approved by the Ethics Committee of Bayannur Hospital. Written informed consent was obtained from all participants.

Tissue microarray (TMA) construction and immunohistochemistry (IHC)

Preparation of Tissue Microarray (TMA): Gastric tissue samples were fixed in 10% formalin, dehydrated, and embedded in paraffin. 4-μm-thick sections were prepared and set aside for use.

Immunohistochemistry (IHC): Sections were deparaffinized and rehydrated, followed by antigen retrieval using citrate buffer. Endogenous peroxidase activity was blocked with 3% H₂O₂, and non-specific binding was blocked with 5% BSA. After incubation with primary and secondary antibodies, DAB staining was performed, followed by hematoxylin counterstaining, dehydration, and mounting for microscopic observation.

Result Evaluation: Staining results were scored blindly by two experienced pathologists using a double-blind method. A total score ≥3 was defined as positive expression, and <3 as negative. All experiments were repeated 3 times to ensure reliability.

Subcutaneous tumor model

Six-week-old male BALB/c immunodeficient nude mice were used, with 6 mice in each group. Tumor cells in the logarithmic growth phase were adjusted to a concentration of 1×10⁷ cells/ml, and 150 μl of the cell suspension was subcutaneously injected into the back of each nude mouse. At the end of the experiment, mice were euthanized, and subcutaneous tumors were dissected, weighed, and photographed. This study was performed in accordance with medical ethical standards and approved by the Ethics Committee of Bayannur Hospital.

Astral-DIA Quantitative Proteomics Analysis

MKN1 cells from METTL17 knockdown and CTRL control groups (3 biological replicates per group) were harvested for total protein extraction, followed by protein quantification, tryptic digestion and desalination. Narrow-window data-independent acquisition (nDIA/Astral-DIA) was performed on an Orbitrap Astral high-resolution mass spectrometer to acquire raw proteomic mass spectrometry data. DIA-NN software was applied for protein identification by database searching against the human Uniprot database. Gene Ontology (GO, including molecular function, cellular component and biological process) and Kyoto Encyclopedia of Genes and Genomes (KEGG) enrichment analyses were conducted for differentially expressed proteins, with enrichment significance calculated via the hypergeometric test.

METTL17 expression in database

In the present study, clinical and transcriptomic data of gastric cancer (GC) patients were retrieved from The Cancer Genome Atlas (TCGA) database, including 50 normal gastric mucosa tissue samples and 350 primary gastric adenocarcinoma tumor samples. To precisely characterize gene expression alterations during malignant transformation, an additional 30 paired samples (tumor tissues and adjacent normal tissues from the same patients) were incorporated into the analysis. Subsequent data processing was performed using the Pandas library in Python, statistical tests were conducted via SciPy, and data visualization was implemented with Matplotlib and Seaborn libraries.
