# Supplementary material
Source: Research Square preprint supplement (doi:10.21203/rs.3.rs-9132959/v1)
Supplement: Supplementary file 3 [file e85e02fa050bdce387c0cde7.docx]

Journal of Cancer Research and Clinical Oncology

METTL17 promotes gastric cancer progression by activating the Wnt/β-catenin signaling pathway through negative regulation of GSK-3β

Man Gao1#, Yixun Zhang1#, Wenjing Bao1#, Yilin Shi2, Weiyi Chen3, Yang Liu1, Rumeng Wang1, Ning Zhang1, Lingli Zhang4*, Lizhou Jia1*

* Correspondence:

Lizhou Jia*, College of Veterinary Medicine, Inner Mongolia Agricultural University, Hohhot, Inner Mongolia, China

jlz@immu.edu.cn

METTL17 protein expression in gastric mucosa tissues

| **Characteristics** | **n** | **METTL17 expression (%)** | | *χ***²** | **P** |
| --- | --- | --- | --- | --- | --- |
| **Low or no High** | |
|  |  |  |  | 78.143 | **＜0.001*** |
| Carcinoma | 630 | 240 (38.10) | 390 (61.90) |  |  |
| Chronic gastritis | 224 | 135 (60.27) | 89 (39.73) |  |  |
| Pericarcinomatous tissue | 217 | 151 (69.59) | 66 (30.41) |  |  |
